# Supplementary material for: Association of SNPs in EGR3 and ARC with Schizophrenia Supports a Biological Pathway for Schizophrenia Risk
Source: PLoS One. 2015 Oct 16;10(10):e0135076. doi: 10.1371/journal.pone.0135076 (PMC4608790; doi:10.1371/journal.pone.0135076)
Supplement: S4 Table — Bold type indicates SNPs selected for follow-up genetic association analysis. (XLSX) [file pone.0135076.s005.xlsx]

## Sheet: Arc EU Table
Chromosome	Genome Posn	RS ID	Reference Sequ	Alternate	MAF Cases	MAF Ctrls	Δ MAF
8	143692827	rs28420666	C	G	0.476313	0.227941	0.248372
8	143686416	rs11167151	C	T	0.216548	0.385773	0.169225
8	143692680	rs28403912	A	G	0.463009	0.304428	0.158581
8	143692683	rs28641083	G	C	0.465173	0.310502	0.15467
8	143686392	rs12544751	C	T	0.354633	0.48566	0.131027
8	143688840	rs7465272	T	A	0.29722	0.175037	0.122184
8	143685140	rs58105878	T	C	0.464513	0.348309	0.116205
8	143685543		A	-A	0.161082	0.276316	0.115233
8	143685502	rs13256489	A	G	0.37435	0.481626	0.107276
8	143690413	rs35900184	C	T	0.283316	0.18096	0.102356
8	143686378	rs12544749	C	T	0.415238	0.515068	0.0998294
8	143685672		T	G	0.0555556	0.150943	0.0953878
8	143685702		C	-CA	0.0816327	0.17561	0.0939771
8	143685695		T	G	0.0835655	0.171271	0.0877053
8	143685506		G	A	0.203599	0.289365	0.0857657
8	143690386		G	C	0.203293	0.282283	0.0789899
8	143685679		T	A	0.0719101	0.149533	0.0776226
8	143693834	rs28625055	G	A	0.183642	0.257136	0.0734937
8	143687835	rs10110456	G	A	0.0842067	0.154453	0.0702465
8	143685709		G	A	0.279362	0.347273	0.0679103
8	143689783		C	T	0.197742	0.265189	0.067447
8	143685541		G	A	0.0799419	0.146875	0.0669331
8	143691186	rs10097505	G	A	0.470273	0.403502	0.0667715
8	143685098	rs12678540	A	G	0.528344	0.461722	0.0666218
8	143687846		C	G	0.179093	0.239522	0.0604289
8	143685539		G	A	0.0962099	0.0366667	0.0595432
8	143694428	rs28600329	C	A	0.440305	0.380973	0.0593319
8	143685005	rs12680428	G	A	0.133551	0.187408	0.0538575
8	143685515		T	G	0.29318	0.346903	0.0537228
8	143689397	rs13260813	A	C	0.0715137	0.121738	0.0502245
8	143692146	rs2234911	G	A	0.466514	0.419461	0.0470531
8	143692774	rs72614036	C	T	0.0510244	0.0968703	0.045846
8	143688267		C	A	0.239085	0.284724	0.0456393
8	143685565		T	G	0.0502137	0.0955882	0.0453746
8	143693236	rs28489307	C	G	0.520217	0.476099	0.0441176
8	143685603		G	+G	0.113462	0.154278	0.0408162
8	143688547	rs60800647	C	G	0.147194	0.187386	0.0401923
8	143685705		G	A	0.0545073	0.0936455	0.0391381
8	143691777	rs28686812	G	C	0.503798	0.467067	0.0367307
8	143687663		C	T	0.0119798	0.0459189	0.0339391
8	143694449		C	+C	0.270468	0.304248	0.0337802
8	143685405		C	T	0.0519938	0.0189292	0.0330647
8	143686437	rs13273921	T	C	0.2034	0.170542	0.0328585
8	143685563		A	G	0.0371585	0.0694087	0.0322503
8	143685296	rs12680931	G	C	0.474905	0.445187	0.029718
8	143688464		C	-CA	0.21987	0.249465	0.0295957
8	143689328	rs36044474	G	C	0.455542	0.426204	0.0293381
8	143688423		C	A	0.3743	0.403107	0.028807
8	143685661		A	G	0.443559	0.471338	0.0277785
8	143688395	rs7002963	C	T	0.36407	0.336718	0.0273523
8	143694486	rs28451207	A	C	0.492385	0.465602	0.0267832
8	143685513		A	-AGT	0.0503716	0.0769231	0.0265515
8	143690591		T	C	0.00121972	0.0258876	0.0246678
8	143685714		G	A	0.150954	0.175209	0.0242543
8	143685518		A	-A	0.0329257	0.0566038	0.0236781
8	143688643		C	G	0.312129	0.334023	0.0218948
8	143688636	rs60275617	A	G	0.10122	0.123004	0.021784
8	143685612		A	G	0.0604839	0.0821485	0.0216646
8	143690518		G	A	0	0.0207942	0.0207942
8	143688443		G	C	0.151134	0.171446	0.0203121
8	143685676		G	+G	0.0390625	0.0593607	0.0202982
8	143694349		C	T	0.177167	0.197092	0.0199252
8	143685426		A	G	0.0216931	0.0413424	0.0196493
8	143693082	rs28734952	A	G	0.490691	0.472052	0.0186384
8	143685545		G	+GGGAG	0.085048	0.0664452	0.0186028
8	143688376	rs11996207	T	G	0.0541953	0.0725195	0.0183242
8	143694258		C	T	0.183429	0.201742	0.0183129
8	143685544		A	G	0.242595	0.260317	0.0177223
8	143688371		C	A	0.414513	0.431533	0.0170204
8	143689148		C	T	0.0484776	0.0315652	0.0169124
8	143688516		C	-CA	0.0686275	0.0851314	0.016504
8	143685723		G	A	0.108581	0.125	0.0164191
8	143686424	rs12544773	C	G	0.0784477	0.0623948	0.0160529
8	143688458		G	A	0.0645161	0.0486726	0.0158436
8	143688781		C	T	0.0718598	0.0867945	0.0149346
8	143688532		G	T	0.0581264	0.073051	0.0149245
8	143688649		C	G	0.128984	0.143178	0.014194
8	143688527		C	A	0.0540128	0.0680992	0.0140864
8	143685628		T	-T	0.0501767	0.0636516	0.0134749
8	143685719		G	A	0.183087	0.1964	0.013313
8	143685602		A	G	0.0341322	0.047138	0.0130059
8	143689251		C	A	0.00590228	0.018675	0.0127727
8	143685898	rs10103454	C	A	0.465581	0.45295	0.0126307
8	143688224		A	G	0.0744059	0.0870235	0.0126176
8	143685728		G	A	0.0732218	0.0857345	0.0125128
8	143694253		C	T	0.0589993	0.0713739	0.0123746
8	143694238		G	+A	0.302693	0.290548	0.0121452
8	143688250		A	G	0.140957	0.152776	0.0118192
8	143689089	rs13252981	A	C	0.47902	0.49016	0.0111396
8	143685660		C	-CA	0.0146082	0.0252366	0.0106284
8	143686365		C	G	0.0346535	0.0244938	0.0101596
8	143686364		T	C	0.0604842	0.0504804	0.0100038
8	143694206		G	C	0.0529483	0.0627702	0.00982198
8	143686449		T	A	0.0173836	0.0271587	0.00977507
8	143694458		A	C	0.0201677	0.0293671	0.0091994
8	143688495		G	C	0.0515184	0.0606407	0.00912229
8	143688510		G	A	0.0441241	0.0531609	0.00903685
8	143688447	rs62513321	C	T	0.150398	0.141443	0.00895497
8	143688550		C	T	0.0189683	0.0277705	0.00880219
8	143694251		G	-G	0.0573359	0.0661339	0.00879796
8	143694240		C	+T	0.0489883	0.0576008	0.00861256
8	143686421	rs71513661	T	C	0.0677907	0.0596794	0.00811134
8	143694259		A	+AT	0.382535	0.390368	0.00783306
8	143688576		T	C	0.0525374	0.0602145	0.00767708
8	143694732		C	T	0.00866021	0.000990835	0.00766938
8	143694186		C	+G	0.288411	0.295853	0.00744221
8	143685415		C	A	0.00586451	0.0132089	0.00734437
8	143686870		G	A	0.000751033	0.0079694	0.00721836
8	143693043	rs28427138	A	G	0.455423	0.462326	0.00690264
8	143688475		C	A	0.21423	0.221102	0.00687176
8	143694249		C	T	0.0399386	0.0467917	0.00685315
8	143692857		G	T	0.000295072	0.00709849	0.00680342
8	143685634		G	-GT	0.0617021	0.0681063	0.00640418
8	143688526		A	C	0.0150943	0.0214944	0.00640003
8	143686003		C	T	0.00728155	0.00132732	0.00595424
8	143688214		C	A	0.0351638	0.0409348	0.00577095
8	143694255		C	A	0.0997544	0.105385	0.00563067
8	143688484		G	A	0.0270449	0.021483	0.00556183
8	143690333	rs34195051	C	T	0.00174406	0.00730331	0.00555925
8	143688412		C	-CA	0.0151045	0.0206394	0.00553493
8	143688742		T	G	0.0322006	0.0268256	0.00537501
8	143688391		G	C	0.0568498	0.0620424	0.0051926
8	143685724		G	A	0.0850467	0.079874	0.0051727
8	143685650		T	-T	0.030083	0.0351759	0.00509289
8	143691762		C	T	0.000603318	0.00554593	0.00494261
8	143690437		G	A	0.00385414	0.00860845	0.00475431
8	143685611		A	-AAGA	0.0166205	0.0210697	0.00444919
8	143688406		G	A	0.0579125	0.0622698	0.00435738
8	143688774		C	-CA	0.0260075	0.0303179	0.00431042
8	143688523		C	T	0.0578512	0.0620294	0.00417816
8	143688670		C	-CA	0.114669	0.110565	0.00410386
8	143688551		C	T	0.00652377	0.0105708	0.00404706
8	143693851		C	T	0.00207918	0.00605961	0.00398043
8	143686798		C	T	0.00437336	0.000623636	0.00374972
8	143688675		C	T	0.0805829	0.0842508	0.0036679
8	143690936		C	A	0.0038562	0.000289687	0.00356651
8	143688209		C	T	0.0639782	0.0606701	0.00330808
8	143687523	rs35079126	C	A	0.00176639	0.00498523	0.00321883
8	143688079	rs11167152	G	C	0.333094	0.336218	0.00312377
8	143685717		G	T	0.0176334	0.0206233	0.00298987
8	143685721		G	A	0.0258684	0.0232068	0.00266169
8	143688428	rs7460662	G	T	0.213917	0.216333	0.0024167
8	143688480	rs35608775	G	T	0.247532	0.245283	0.00224872
8	143685019		G	A	0.000509251	0.00256965	0.0020604
8	143688354		G	A	0.039663	0.0377061	0.00195681
8	143685729		G	A	0.0180524	0.019977	0.00192466
8	143688722		C	-CA	0.0550073	0.0531401	0.00186725
8	143688272		G	T	0.0324114	0.0306676	0.00174374
8	143688432		G	A	0.030906	0.0293526	0.00155338
8	143690911		C	T	0.00208914	0.000647564	0.00144157
8	143686409	rs12547713	T	C	0.0976639	0.0964995	0.00116438
8	143688552		G	A	0.0285648	0.0296744	0.00110958
8	143688681		T	C	0.0518721	0.0507745	0.00109755
8	143688654		A	G	0.161121	0.16209	0.000968512
8	143689757		G	A	0.00144788	0.0004884	0.000959476
8	143688809		C	T	0.00175175	0.000806925	0.000944827
8	143694315		T	C	0.0129492	0.0138202	0.000871038
8	143693751	rs28660666	G	A	0.00146413	0.00222983	0.000765703
8	143688585		T	C	0.0278297	0.0285352	0.000705495
8	143688339	rs11991795	C	G	0.0533246	0.0540222	0.000697566
8	143688524		C	T	0.0198439	0.0204875	0.000643609
8	143688499		C	T	0.0654604	0.0649573	0.000503086
8	143688235		G	C	0.0291452	0.0295435	0.000398292
8	143688625		T	C	0.0181321	0.0177717	0.000360354
8	143688758		G	A	0.0177978	0.0181392	0.000341342
8	143688634		G	T	0.0571296	0.0568949	0.000234698
8	143688586		G	A	0.0267279	0.0264943	0.000233641
8	143694187		C	T	0.014853	0.0150023	0.00014924
